# Supplementary material
Source: MDPI journal article supplement (https://www.mdpi.com/2072-4292/9/3/301)
Supplement: s1 [file s1]

Article

# Evaluation of Satellite Retrievals of Chlorophyll-*a* in the Arabian Gulf

Noora Al-Naimi<sup>1,2,\*</sup>, Dionysios E. Raitos<sup>3,4</sup>, Radhouan Ben-Hamadou<sup>2</sup> and Yousria Soliman<sup>2</sup>

**Table S1.** Descriptive statistics of top 10 m chlorophyll-*a* *in situ* measurements ( $\text{mg}\cdot\text{m}^{-3}$ ) in the EEZ of Qatar during six sampling cruises in 2015–2016.

| Season         | <i>In situ</i> Measurements of Chlorophyll- <i>a</i> ( $\text{mg}\cdot\text{m}^{-3}$ ) |         |         |                    |
|----------------|----------------------------------------------------------------------------------------|---------|---------|--------------------|
|                | Minimum                                                                                | Maximum | Average | Standard Deviation |
| April 2015     | 0.135                                                                                  | 0.787   | 0.287   | 0.088              |
| June 2015      | 0.085                                                                                  | 1.202   | 0.227   | 0.137              |
| November 2015  | 0.216                                                                                  | 1.401   | 0.661   | 0.246              |
| February 2016  | 0.096                                                                                  | 2.455   | 0.551   | 0.410              |
| April 2016     | 0.067                                                                                  | 0.689   | 0.192   | 0.078              |
| September 2016 | 0.069                                                                                  | 1.801   | 0.365   | 0.251              |

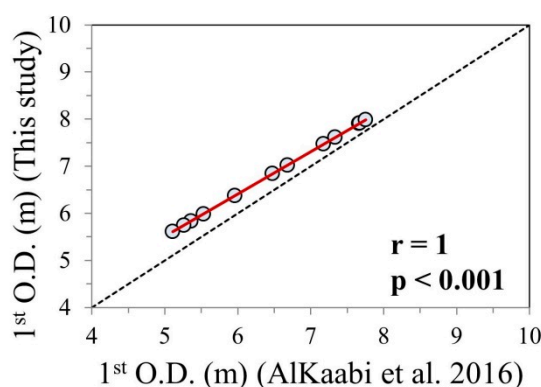

**Figure S1.** Correlation between 1st optical depth in the Arabian Gulf derived from OC-CCI  $K_d$  data and Al Kaabi et al. (2016) algorithm.

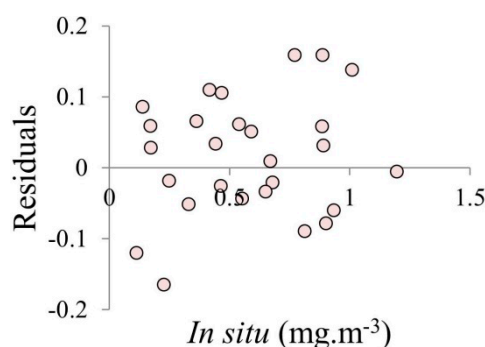

**Figure S2.** Residual plot of *in situ* Chl-*a* and Chl-*a* from linear regression of Figure 6 showing that the linear regression model is adequate to capture the linear trend of the analyzed data (residuals evenly distributed vertically).
